# Supplementary material
Source: Springer Nature journal article supplement (https://www.springermedizin.de/resource/supplementary/12990_2010_333_MOESM5_ESM.pdf/9613054)

A

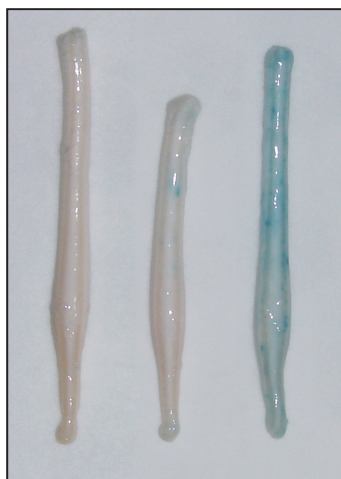

Naive C-stim + C-stim  
lidocaine

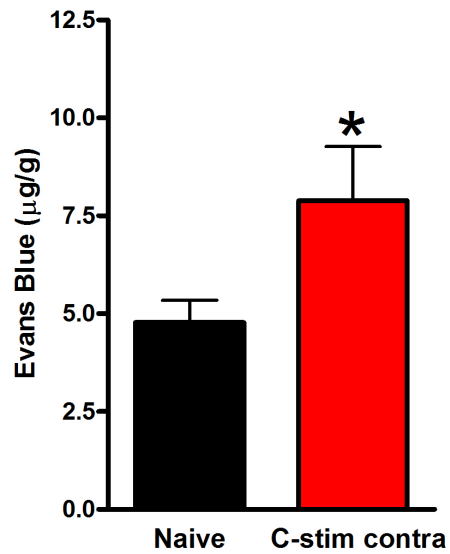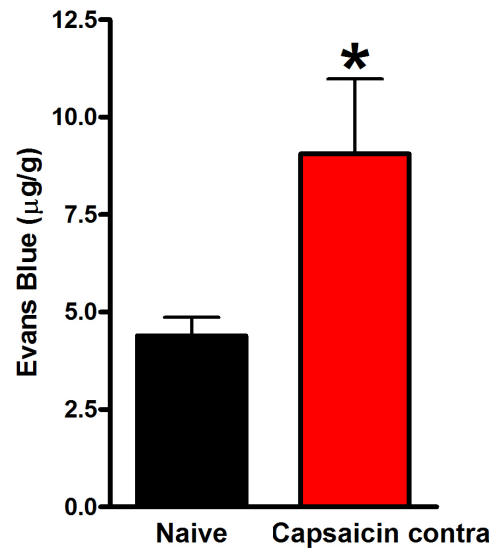

B

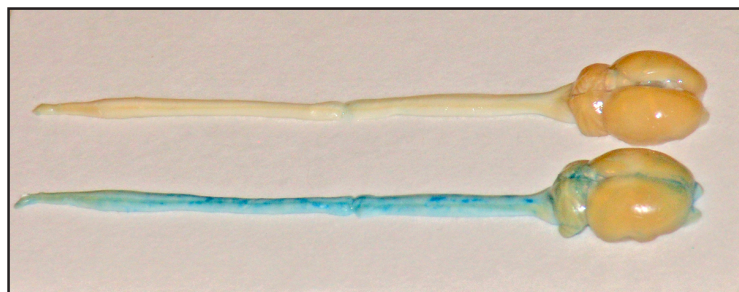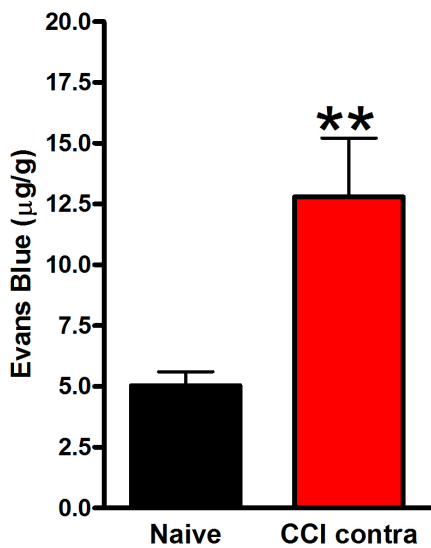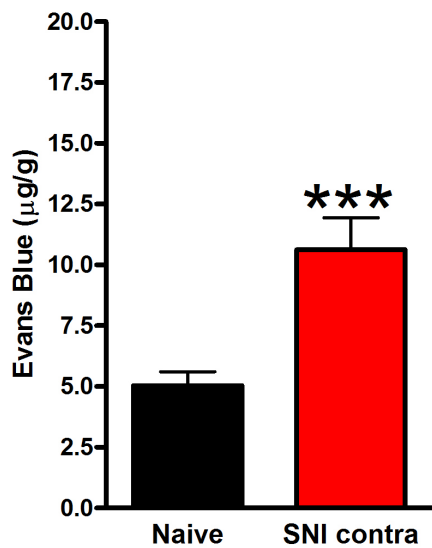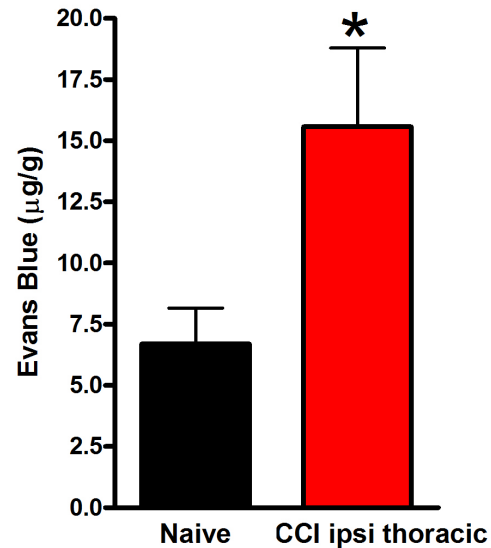

Supplement: MOESM5 [file 9613054]
